# Supplementary material for: Synergistic heating effect via CNT/Fe3O4 nanocomposite aerogels enabling uniform and rapid induction welding with high bond strength in CFRTPs
Source: Research Square preprint supplement (doi:10.21203/rs.3.rs-8372467/v1), 2026-01-20
Supplement: Supplementary file 1 [file d1212abf42a924d235a22348.docx]

**Synergistic heating effect via CNT/Fe3O4 nanocomposite aerogels enabling uniform and rapid induction welding with high bond strength in CFRTPs**

Nayeong Kima,b,1, Inseok Baeka,1, Byeongho Parka, Dayoung Kima,b, Chaewon Jeonga, Jungwan Leea, Jung-soo Kima, Geunsu Jooa, Seokpum Kimc, Vipin Kumarc, Youngseok Oha,*, Jinsu Kima,*

*aComposites* *& Convergence Materials Research Division, Korea Institute of Materials Science (KIMS), Changwon-daero 797, Seongsan-gu, Changwon-si, Gyeongsangnam-do, 51508, Republic of Korea*

*bSchool of Chemical Engineering, Pusan National University,* *2 Busandaehak-ro 63beon-gil, Geumjeong-gu, Busan 46241, South Korea*

*cManufacturing Science Division, Oak Ridge National Laboratory, P.O. Box 2008*, *Oak Ridge, Tennessee 37831, USA.*

*1There authors contributed equally to this work.*

*Corresponding authors: Youngseok Oh (youngsoh@kims.re.kr), Jinsu Kim (jinsu@kims.re.kr)


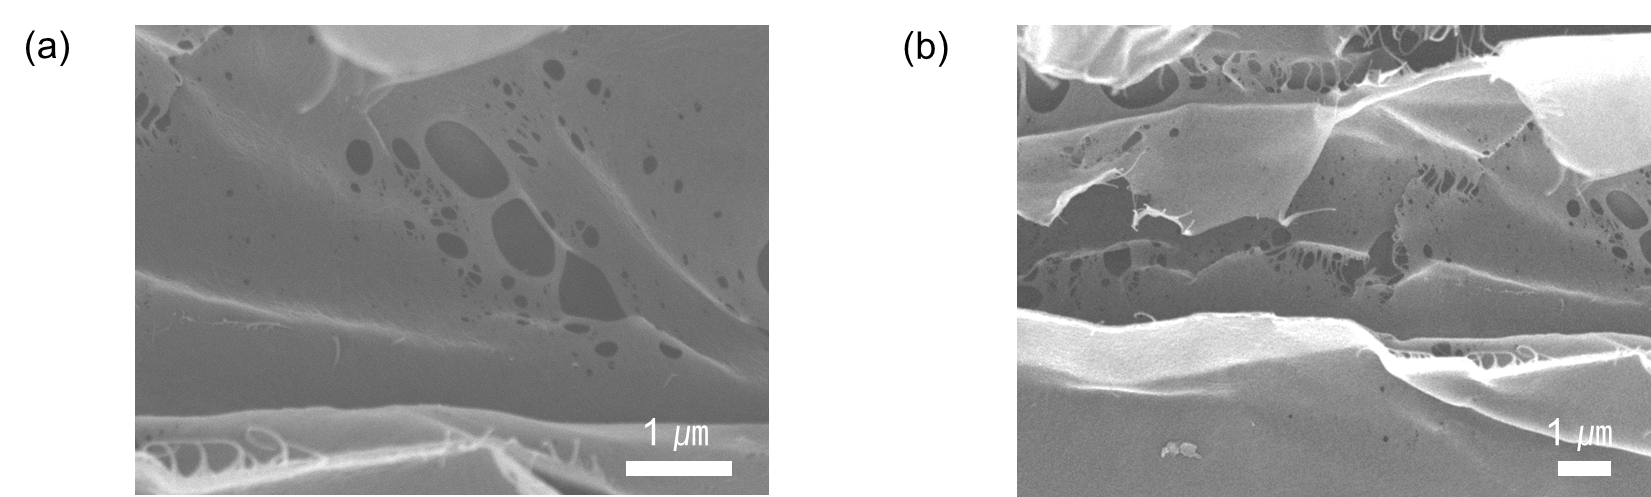


Figure S1. Additional SEM images of the freeze-dried aerogel monolith.


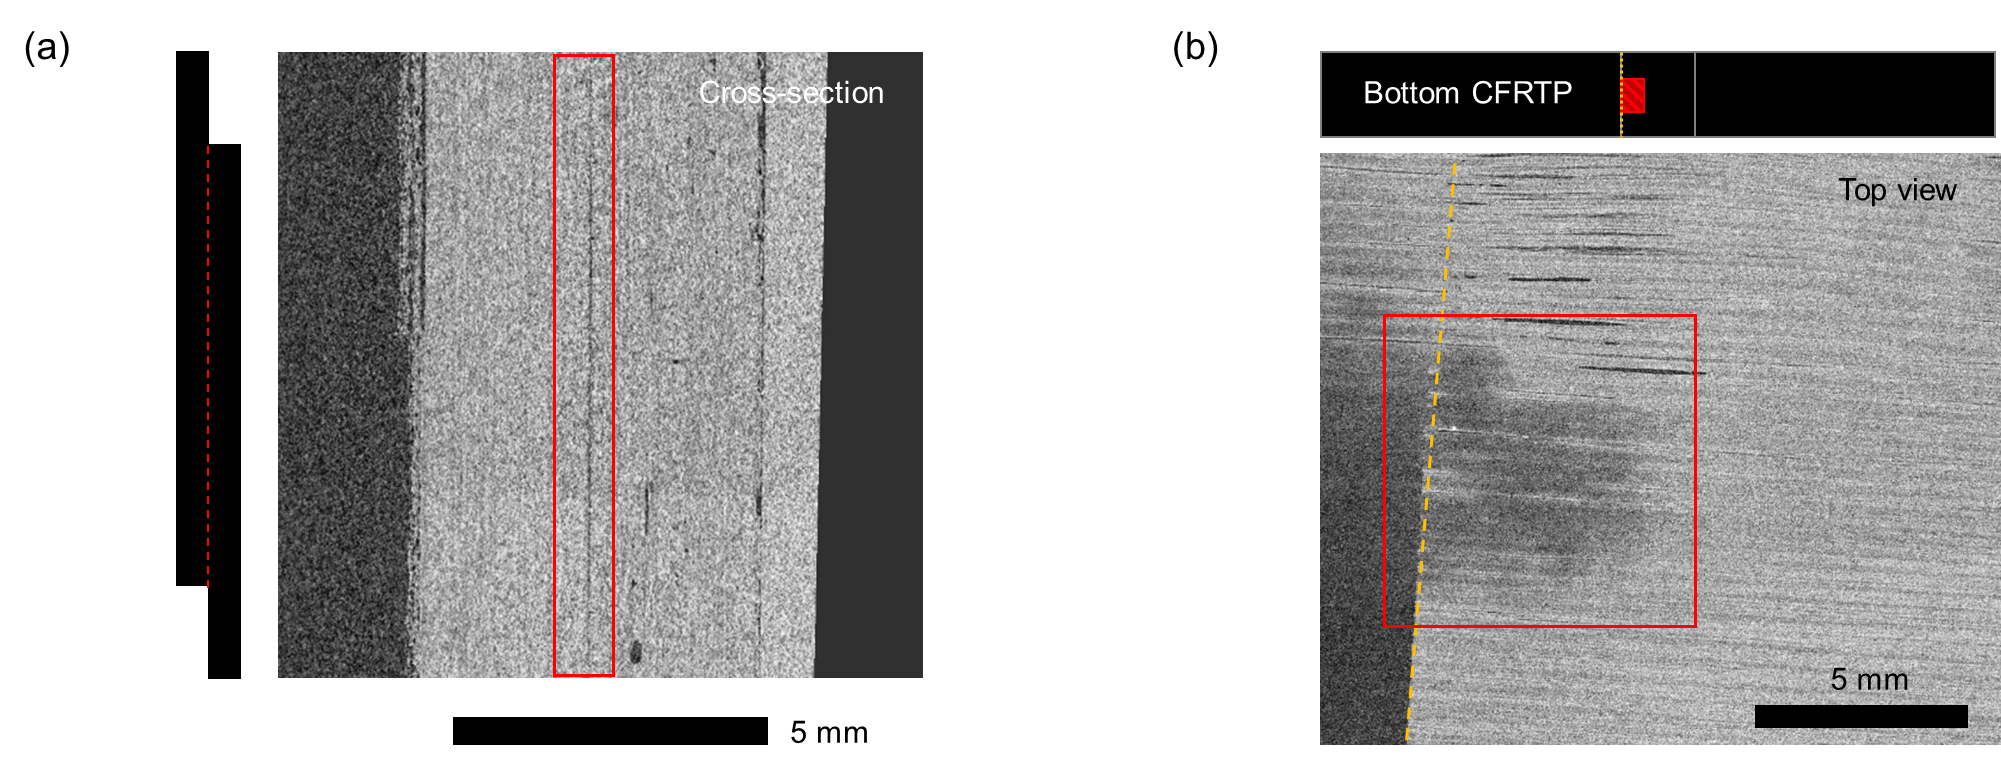


Figure S2. Micro-CT analysis for evaluating weld-line integrity in the CFRP-only joint: (a) cross-section; (b) top view.
